# Supplementary figures and images for: An in vivo mimetic liver-lobule-chip (LLoC) for stem cell maturation, and zonation of hepatocyte-like cells on chip
Source: Royal Society of Chemistry journal article supplement (doi:10.1039/d4lc00509k), 2025-01-01

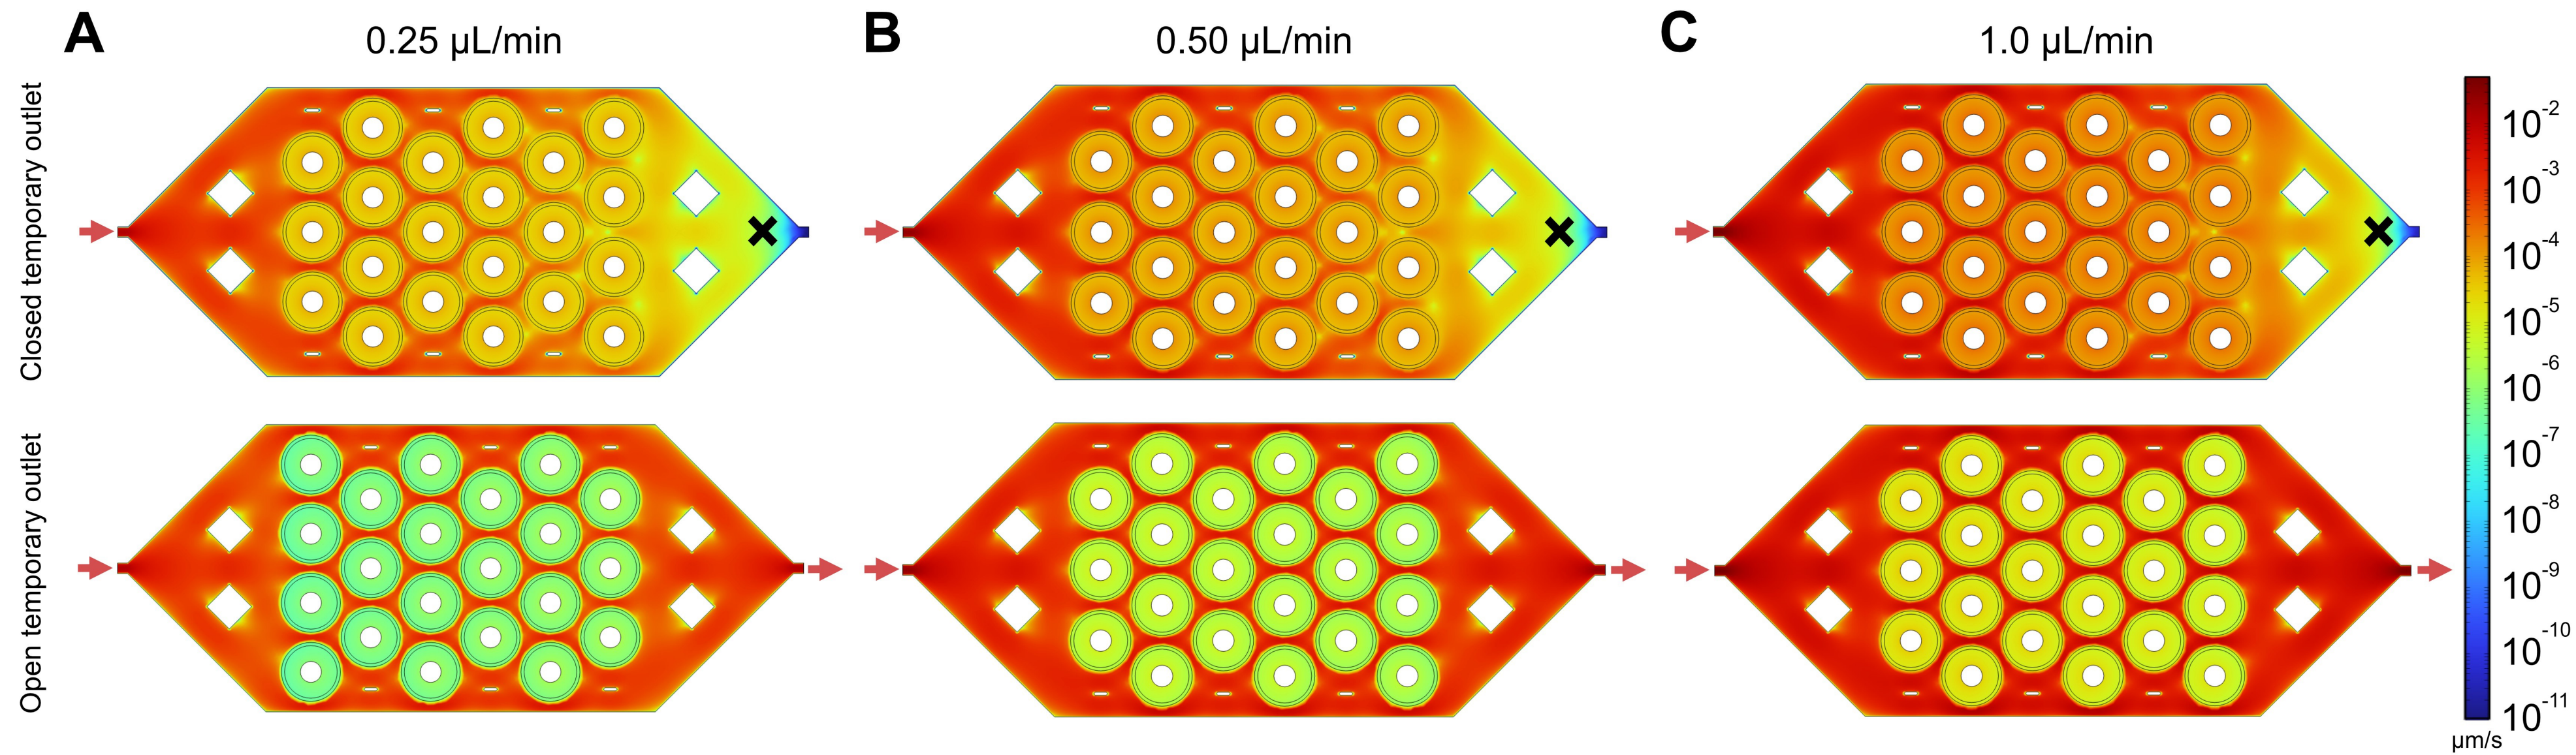

Supplement: d4lc00509k1.pdf [file d4lc00509k1.pdf]
